# Supplementary material for: Thermodynamically effective molecular surfaces for more efficient study of condensed-phase thermodynamics
Source: Research Square preprint supplement (doi:10.21203/rs.3.rs-816803/v1), 2021-08-16
Supplement: Supplementary file 1 [file f339c37c91c50f51f3bc3b55.xlsx]

## Sheet: Sheet1
Compound	AAD(Eq(11)-TE)	AAD(Kabo)	AAD(Eq(11)-vdW)	Gama0	A(TE)	A(vdW,UFF)	A(vdW, UA0)	A(vdW, Pauling)			All AAD are in kcal/mol
1,1,1-TRICHLOROTRIFLUOROETHANE	0.145	0.237	0.566	0.059	749153	912447	912291	820961			All molecular surfaces (A) are in m2/mol
1,1,1-TRIFLUOROETHANE	0.091	0.185	0.117	0.053	590008	628022	670237	511111
1,1,2-TRICHLOROTRIFLUOROETHANE	0.145	0.268	0.186	0.055	810778	917915	917777	825309
1,1-DIFLUOROETHANE	0.118	0.233	0.594	0.057	615122	593829	628022	486782
1,1-DIMETHOXYETHANE	0.276	0.41	1.008	0.061	793140	928701	1.05916e+06	835420
1,1-DIMETHYLCYCLOHEXANE	0.189	0.352	0.369	0.056	958413	1.14367e+06	1.13824e+06	1.13489e+06
1,1-DIMETHYLCYCLOPENTANE	0.247	0.427	0.301	0.056	892093	1.05617e+06	1.0587e+06	1.0179e+06
1,2,4-TRIMETHYLBENZENE	0.232	0.496	0.363	0.062	1.07105e+06	1.1616e+06	1.26393e+06	1.07638e+06
1,2-DIBROMOTETRAFLUOROETHANE	0.139	0.264	0.288	0.056	799812	917705	917626	825128
1,2-DICHLOROTETRAFLUOROETHANE	0.122	0.243	0.136	0.05	756467	854335	854227	749733
1,3-CYCLOHEXADIENE	0.124	0.29	0.159	0.07	699169	835649	796072	724055
1,3-DIMETHYLADAMANTANE	0.31	0.541	0.313	0.055	1.20393e+06	1.40843e+06	1.34445e+06	1.42462e+06
1,4-DIOXANE	0.161	0.341	0.346	0.077	716632	805111	798475	713782
1-BUTENE	0.12	0.231	0.514	0.055	628737	753039	810146	645510
1-CHLORO-1,1-DIFLUOROETHANE	0.111	0.239	0.122	0.056	644068	697414	733178	596268
1-CHLOROPENTANE	0.164	0.344	0.162	0.06	905771	1.05496e+06	1.04941e+06	980153
1-DECENE	0.302	0.526	0.583	0.053	1.29735e+06	1.60161e+06	1.56308e+06	1.50984e+06
1-DODECENE	0.241	0.533	0.536	0.052	1.53685e+06	1.88259e+06	1.8149e+06	1.79646e+06
1-HEPTENE	0.147	0.293	0.422	0.054	976585	1.18623e+06	1.18445e+06	1.08221e+06
1-HEXADECENE	0.422	0.493	0.652	0.051	1.99132e+06	2.44369e+06	2.31795e+06	2.36899e+06
1-OCTENE	0.107	0.274	0.384	0.054	1.08836e+06	1.30306e+06	1.30159e+06	1.2187e+06
1-TETRADECENE	0.229	0.549	0.427	0.051	1.78581e+06	2.16317e+06	2.06641e+06	2.08281e+06
1-UNDECENE	0.283	0.536	0.527	0.052	1.4187e+06	1.74232e+06	1.68673e+06	1.65318e+06
2,2,3,3-TETRAMETHYLPENTANE	0.115	0.321	0.793	0.053	1.10967e+06	1.27647e+06	1.38206e+06	1.35222e+06
2,2,3-TRIMETHYLPENTANE	0.132	0.363	0.696	0.051	1.06488e+06	1.22829e+06	1.31365e+06	1.24334e+06
2,2,4,4-TETRAMETHYLPENTANE	0.15	0.351	0.759	0.049	1.13257e+06	1.32807e+06	1.40635e+06	1.38805e+06
2,2,4-TRIMETHYLPENTANE	0.133	0.342	0.628	0.048	1.07957e+06	1.24828e+06	1.3268e+06	1.26616e+06
2,2,5-TRIMETHYLHEXANE	0.216	0.337	0.682	0.048	1.21522e+06	1.40743e+06	1.47717e+06	1.41496e+06
1,1-DICHLORO-2,2,2-TRIFLUOROETHANE	0.108	0.263	0.34	0.056	761513	823376	807291	726524
2,2-DIMETHYL-3-ETHYLPENTANE	0.255	0.46	1.035	0.052	1.1132e+06	1.32648e+06	1.41162e+06	1.36504e+06
2,2-DIMETHYLBUTANE	0.093	0.244	0.46	0.049	888016	1.01604e+06	1.09249e+06	991281
2,2-DIMETHYLHEXANE	0.14	0.339	0.565	0.049	1.11652e+06	1.29585e+06	1.35328e+06	1.2758e+06
2,2-DIMETHYLPENTANE	0.114	0.304	0.576	0.049	997086	1.15527e+06	1.22778e+06	1.13701e+06
2,3,3-TRIMETHYLPENTANE	0.154	0.379	0.766	0.052	1.04495e+06	1.19965e+06	1.2964e+06	1.24615e+06
2,3,4-TRIMETHYLPENTANE	0.158	0.387	0.811	0.051	1.0643e+06	1.23587e+06	1.33155e+06	1.24682e+06
2,3-DIMETHYLBUTANE	0.14	0.316	0.627	0.051	881407	1.02523e+06	1.10526e+06	988529
2,3-DIMETHYLHEXANE	0.177	0.379	0.665	0.052	1.09182e+06	1.27331e+06	1.34616e+06	1.2702e+06
2,3-DIMETHYLPENTANE	0.168	0.374	0.735	0.052	971952	1.13803e+06	1.2203e+06	1.12312e+06
2,4-DIMETHYL-3-ETHYLPENTANE	0.222	0.426	1.118	0.053	1.10844e+06	1.32621e+06	1.41526e+06	1.36336e+06
2,4-DIMETHYLHEXANE	0.188	0.361	0.684	0.051	1.09474e+06	1286793	1.35632e+06	1.27198e+06
2,4-DIMETHYLPENTANE	0.119	0.322	0.594	0.05	1.00479e+06	1.16369e+06	1.2443e+06	1.13683e+06
2,5-DIMETHYLHEXANE	0.143	0.349	0.619	0.05	1.12484e+06	1.31256e+06	1.37518e+06	1.27799e+06
2,6-DIMETHYLHEPTANE	0.229	0.443	0.627	0.05	1.24217e+06	1.44965e+06	1.49814e+06	1.4197e+06
2-BROMOPROPANE	0.192	0.284	0.458	0.067	679158	796283	848012	723333
2-HEPTANONE	0.134	0.364	0.185	0.059	1.12407e+06	1.24458e+06	1.26766e+06	1.14614e+06
2-HEXANONE	0.129	0.346	0.199	0.06	1.01512e+06	1.09873e+06	1.14536e+06	1.00003e+06
2-METHYL-2-BUTENE	0.116	0.261	0.726	0.057	759843	866897	987018	772093
tert-BUTYL ALCOHOL	0.102	0.016	3.322	0.061	1.16864e+06	850987	913724	779554
3-ETHYL-2-METHYLPENTANE	0.153	0.376	0.974	0.052	1.07616e+06	1.26139e+06	1.36372e+06	1.25191e+06
2-METHYLBUTANAL	0.263	0.412	0.557	0.06	908189	931802	964821	853245
2-METHYLHEPTANE	0.164	0.4	0.54	0.051	1.13494e+06	1.34244e+06	1.37386e+06	1.28687e+06
2-METHYLHEXANE	0.214	0.391	0.631	0.051	1.00222e+06	1.19953e+06	1.24921e+06	1.14481e+06
2-METHYLOCTANE	0.253	0.475	0.513	0.052	1.24687e+06	1.48071e+06	1.50088e+06	1.43592e+06
2-METHYLPENTANE	0.153	0.324	0.567	0.051	901090	1.05776e+06	1.12254e+06	1.00001e+06
2-METHYLPYRIDINE	0.142	0.373	0.303	0.073	814173	882374	913321	757291
2-METHYLTHIOLANE	0.266	0.441	0.35	0.066	856653	954951	952120	873148
2-METHYL THIOPHENE	0.098	0.292	0.236	0.07	785404	852414	881814	736527
2-PENTANONE	0.104	0.24	0.429	0.06	936992	959323	1.02043e+06	860953
3,3-DIETHYLPENTANE	0.141	0.352	0.743	0.053	1.13237e+06	1.31461e+06	1.39832e+06	1.37374e+06
3,3-DIMETHYLHEXANE	0.138	0.367	0.631	0.05	1.09073e+06	1.26021e+06	1.33148e+06	1.25324e+06
3,3-DIMETHYLPENTANE	0.177	0.349	0.776	0.051	947505	1.12133e+06	1.19712e+06	1.11729e+06
3,4-DIMETHYLHEXANE	0.161	0.366	0.707	0.053	1.07713e+06	1.25536e+06	1.33765e+06	1.25972e+06
3-ETHYLHEXANE	0.169	0.377	0.6	0.053	1.09867e+06	1.2875e+06	1.34251e+06	1.2725e+06
3-ETHYLPENTANE	0.212	0.382	0.711	0.053	966582	1.14336e+06	1.20846e+06	1.14127e+06
3-HEXANONE	0.126	0.346	0.168	0.06	1.00451e+06	1.09095e+06	1.13994e+06	1.00084e+06
3-METHYL-1-BUTENE	0.099	0.24	0.413	0.051	769771	884800	952686	791327
3-ETHYL-3-METHYLPENTANE	0.161	0.387	0.729	0.052	1.05024e+06	1.21011e+06	1.29708e+06	1.24891e+06
3-METHYLHEPTANE	0.153	0.376	0.595	0.052	1.1247e+06	1.32368e+06	1.36566e+06	1.27664e+06
3-METHYLHEXANE	0.134	0.358	0.613	0.052	1.00521e+06	1.18089e+06	1.24144e+06	1.13238e+06
3-METHYLPENTANE	0.117	0.27	0.58	0.053	891569	1.04269e+06	1.10852e+06	993949
3-METHYLTHIOPHENE	0.129	0.341	0.283	0.071	779911	846464	879104	738032
DIETHYL KETONE	0.284	0.099	0.417	0.063	919507	947989	1.01538e+06	850276
4-METHYLHEPTANE	0.167	0.366	0.579	0.052	1.13084e+06	1.3242e+06	1370553	1.27665e+06
ACENAPHTHENE	0.465	0.793	1.169	0.073	1.17555e+06	1.24406e+06	1.19317e+06	1.09655e+06
ACETOPHENONE	0.227	0.505	0.329	0.076	959703	1.04707e+06	1.06379e+06	917970
ETHYNE	0.055	0.109	0.341	0.063	413182	408141	437787	294795
AMMONIA	0.136	0.229	0.871	0.102	348347	325025	343326	247209
ANILINE	0.413	0.536	1.347	0.086	840051	871943	830741	750239
ANISOLE	0.196	0.462	0.2	0.074	868144	970879	1.00425e+06	852541
BENZENE	0.141	0.283	0.433	0.071	690871	778097	741736	648009
BENZOPHENONE	0.207	0.534	0.728	0.073	1.29857e+06	1.42195e+06	1.36748e+06	1.28314e+06
BROMINE	0.13	0.299	0.358	0.098	459257	513773	513556	457606
1-BROMOBENZENE	0.094	0.315	0.455	0.074	822154	915428	884475	802992
CARBON TETRACHLORIDE	0.117	0.288	0.154	0.067	710119	794187	793946	720002
CHLORINE	0.113	0.213	0.353	0.075	408139	447856	447669	381843
CHLORODIFLUOROMETHANE	0.071	0.168	0.55	0.061	533613	555367	541823	457546
cis-1,2-DIMETHYLCYCLOHEXANE	0.225	0.386	0.393	0.057	963737	1.14637e+06	1.14246e+06	1.14054e+06
cis-1,3-DIMETHYLCYCLOHEXANE	0.212	0.381	0.297	0.053	1.01238e+06	1.1382e+06	1.12979e+06	1.13377e+06
cis-1,4-DIMETHYLCYCLOHEXANE	0.235	0.4	0.393	0.056	982023	1.16625e+06	1.16048e+06	1.13934e+06
cis-2-BUTENE	0.1	0.24	0.407	0.057	652853	737069	823665	636784
ISOPROPYLBENZENE	0.173	0.39	0.206	0.061	1.03379e+06	1.16324e+06	1.18597e+06	1.07528e+06
CYCLOHEPTANE	0.141	0.343	0.315	0.061	885850	1.03188e+06	978021	1.00356e+06
CYCLOHEXANE	0.198	0.319	0.173	0.063	762054	934060	887059	865873
CYCLOHEXANONE	0.175	0.416	0.64	0.072	862803	945448	911363	863073
CYCLOHEXYLAMINE	0.258	0.391	0.389	0.07	850685	1.00291e+06	945821	958895
CYCLOOCTANE	0.197	0.388	0.397	0.061	978774	1.12641e+06	1.06837e+06	1.12093e+06
CYCLOPENTANE	0.131	0.282	0.259	0.065	656892	823828	797433	733775
DICHLOROFLUOROMETHANE	0.088	0.222	0.5	0.068	580780	626143	611901	542877
DIETHYL DISULFIDE	0.131	0.32	0.561	0.065	956569	1.09927e+06	1.1655e+06	1.00107e+06
DIETHYL ETHER	0.13	0.235	0.479	0.058	773489	883337	967784	777362
DIETHYL OXALATE	0.268	0.415	0.332	0.071	1.14555e+06	1.23968e+06	1.32757e+06	1.11723e+06
DIETHYL SUCCINATE	0.346	0.432	0.445	0.065	1.35314e+06	1.51081e+06	1.56804e+06	1.3906e+06
DIETHYL SULFIDE	0.182	0.369	0.564	0.063	820775	958191	1.02331e+06	861116
DIFLUOROMETHANE	0.124	0.2	0.651	0.069	462628	447260	465952	345422
DIIODOMETHANE	0.292	0.251		0.093	680839
ISOPROPYL ETHER	0.387	0.547	1.275	0.052	908508	1.13365e+06	1.2428e+06	1.05264e+06
DIMETHYLAMINE	0.133	0.192	0.485	0.065	663407	624385	717335	534272
DIPHENYLMETHANE	0.289	0.572	0.365	0.07	1.23072e+06	1.43988e+06	1.35701e+06	1.29364e+06
ETHANE	0.108	0.159	0.48	0.049	452452	519927	627035	432060
ETHANOL	0.244	0.409	3.675	0.068	982672	591758	633653	496580
ETHYL ACETATE	0.144	0.329	0.145	0.064	833902	875816	978635	769335
ETHYL FORMATE	0.199	0.361	0.465	0.067	712212	732980	773369	630786
ETHYL ISOBUTYRATE	0.355	0.513		0.058	982755
ETHANETHIOL	0.175	0.321	0.175	0.068	608233	669490	715823	583285
ETHYL PROPIONATE	0.224	0.334	0.353	0.062	919596	1.01949e+06	1.09294e+06	915199
ETHYLBENZENE	0.203	0.412	0.196	0.064	921396	1.05719e+06	1.05126e+06	939348
ETHYLCYCLOHEXANE	0.209	0.408	0.235	0.057	981776	1.15537e+06	1.13544e+06	1.13198e+06
ETHYLCYCLOPENTANE	0.116	0.323	0.134	0.057	920741	1.08578e+06	1.06318e+06	1.02393e+06
ETHYLENE	0.075	0.133	0.205	0.051	406726	460328	525468	360543
OXIRANE	0.111	0.261	0.458	0.079	503078	514465	554951	406660
FLUOROBENZENE	0.162	0.334	0.504	0.068	742425	814066	784649	679516
FURAN	0.15	0.288	0.472	0.072	588649	638187	633280	517019
1,2,3,4,5,6-HEXAFLUOROBENZENE	0.094	0.245	0.272	0.063	860036	981429	981423	812079
HYDRAZINE	0.343	0.579	1.645	0.14	445414	446194	424069	352341
HYDROGEN BROMIDE	0.131	0.191	0.311	0.075	353727	360314	398235	307176
HYDROGEN CHLORIDE	0.093	0.161	0.675	0.068	370473	323002	357333	265757
HYDROGEN CYANIDE	0.371	0.228	3.2	0.063	752363	369347	388853	263342
HYDROGEN IODIDE	0.157	0.234		0.074	399455
HYDROGEN SULFIDE	0.08	0.162	0.078	0.08	353604	363867	442081	298035
ISOBUTANE	0.089	0.216	0.534	0.05	679284	794585	879357	719822
ISOBUTENE	0.103	0.236	0.574	0.055	647728	742579	842243	643354
ISOBUTYL FORMATE	0.123	0.303	0.473	0.06	966712	997219	1.03664e+06	916542
2-METHYL-PROPANETHIOL	0.159	0.341	0.191	0.059	851129	926960	968609	858641
ISOBUTYLAMINE	0.107	0.299	0.36	0.062	829309	888058	910346	815523
ISOBUTYLBENZENE	0.316	0.533	0.316	0.057	1.15244e+06	1.30471e+06	1.29558e+06	1.22418e+06
ISOPENTANE	0.13	0.279	0.601	0.051	779238	917289	993588	854763
2-PROPANOL	0.391	0.555	4.002	0.059	1.19782e+06	730161	782312	641680
PROPANE-2-THIOL	0.107	0.265	0.136	0.061	725720	797397	858930	720930
ISOPROPYLCYCLOPENTANE	0.237	0.424	0.406	0.056	990451	1.19414e+06	1.18627e+06	1.16474e+06
m-DIETHYLBENZENE	0.224	0.461	0.622	0.059	1.13716e+06	1.34179e+06	1.36406e+06	1.22771e+06
MESITYLENE	0.237	0.491	0.432	0.061	1.09037e+06	1.18845e+06	1.30695e+06	1.08018e+06
METHANE	0.044	0.07	0.663	0.039	320853	366764	561931	287075
METHANOL	0.127	0.259	3.587	0.069	853507	446971	514598	356274
METHYL ACETATE	0.155	0.319	0.332	0.07	701111	746270	858906	632954
2-BUTANONE	0.218	0.379	0.354	0.064	801639	812506	893827	713758
METHYL FORMATE	0.134	0.299	0.199	0.078	569364	600622	656615	489571
METHYL n-BUTYRATE	0.138	0.343	0.407	0.063	914397	1.02444e+06	1.10183e+06	919945
METHYL PROPIONATE	0.121	0.303	0.361	0.067	807498	887047	976624	773321
1-PROPYNE	0.128	0.235	0.24	0.067	518470	557956	648347	435854
METHYLAMINE	0.166	0.285	0.533	0.083	490786	482115	537193	392159
METHYLCYCLOHEXANE	0.102	0.278	0.143	0.058	877850	1.03725e+06	1.0193e+06	1.00607e+06
METHYLCYCLOPENTANE	0.111	0.297	0.301	0.06	789544	956914	947038	879471
m-ETHYLTOLUENE	0.368	0.578	0.649	0.062	1.01879e+06	1.19617e+06	1.23891e+06	1.08111e+06
1,3-DIMETHYLBENZENE	0.187	0.424	0.268	0.063	948944	1.05068e+06	1.11511e+06	941907
NAPHTHALENE	0.505	0.507	0.766	0.072	972788	1.0783e+06	1.02668e+06	945870
BUTANE	0.132	0.249	0.424	0.052	685609	805689	872329	727385
BUTYL ACETATE	0.18	0.344	0.246	0.06	1.05756e+06	1.16431e+06	1.23059e+06	1.05644e+06
BUTANETHIOL	0.136	0.336	0.133	0.063	828176	951639	964435	867349
BUTYLBENZENE	0.162	0.409	0.264	0.06	1.16326e+06	1.3205e+06	1.29026e+06	1.22163e+06
BUTYLCYCLOHEXANE	0.436	0.505	0.364	0.055	1.2084e+06	1.44392e+06	1.39202e+06	1.42196e+06
DECANE	0.188	0.41	0.463	0.052	1.37738e+06	1.65049e+06	1.62738e+06	1.57507e+06
DODECANE	0.251	0.463	0.432	0.051	1.61577e+06	1.92975e+06	1.88017e+06	1.86046e+06
HEPTANE	0.143	0.339	0.564	0.053	1.01841e+06	1.22593e+06	1.25187e+06	1.14391e+06
HEXANE	0.161	0.328	0.58	0.053	897707	1.08993e+06	1.12352e+06	1.00853e+06
1-HEXANETHIOL	0.177	0.41	0.178	0.06	1.05273e+06	1.23193e+06	1.21566e+06	1.15202e+06
NITRIC OXIDE	0.081	0.081	0.123	0.082	275743	320340	320340	222609
NITROGEN	0.024	0.038	0.132	0.028	310326	328771	328771	231540
NITROUS OXIDE	0.092	0.113	0.148	0.072	351014	399939	399939	287322
NONANE	0.182	0.411	0.482	0.052	1.26164e+06	1.50645e+06	1.50384e+06	1.43007e+06
OCTANE	0.15	0.377	0.442	0.052	1.14743e+06	1.37162e+06	1.37429e+06	1.29059e+06
PENTANE	0.121	0.281	0.473	0.053	801140	945454	999905	857744
1-PENTANETHIOL	0.146	0.353	0.143	0.062	942660	1.09089e+06	1.0927e+06	1.01351e+06
PENTYLAMINE	0.191	0.395	0.271	0.063	918877	1.05368e+06	1.02892e+06	962882
PROPYL ACETATE	0.199	0.332	0.279	0.062	938333	1.02139e+06	1.10602e+06	912417
PROPYL FORMATE	0.196	0.27	0.529	0.063	842990	876532	900939	775814
n-PROPYLMERCAPTAN	0.106	0.275	0.105	0.066	720813	809182	840497	722140
PROPYLBENZENE	0.168	0.407	0.23	0.062	1.03453e+06	1.17664e+06	1.15749e+06	1.0825e+06
PROPYLCYCLOHEXANE	0.306	0.443	0.352	0.056	1.08748e+06	1.29762e+06	1.26761e+06	1.2831e+06
PROPYLCYCLOPENTANE	0.153	0.358	0.179	0.057	1.03441e+06	1.22753e+06	1.19301e+06	1.16578e+06
TETRADECANE	0.371	0.528	0.5	0.05	1.84157e+06	2.20949e+06	2.13266e+06	2.14622e+06
TRIDECANE	0.321	0.517	0.508	0.051	1.72332e+06	2.06748e+06	2.00778e+06	2.00241e+06
UNDECANE	0.244	0.429	0.432	0.052	1.50224e+06	1.78697e+06	1.75581e+06	1.71624e+06
o-DIETHYLBENZENE	0.251	0.425	0.415	0.061	1.12517e+06	1.27654e+06	1.31667e+06	1.19723e+06
o-ETHYLTOLUENE	0.191	0.449	0.249	0.063	1.03299e+06	1.15162e+06	1.19309e+06	1.06632e+06
o-TOLUIDINE	0.238	0.414	0.918	0.078	963638	991312	1.00061e+06	876327
OXYGEN	0.05	0.062	0.059	0.038	265430	311380	311380	212239
1,2-DIMETHYLBENZENE	0.164	0.406	0.164	0.064	938304	1.02626e+06	1.07741e+06	931742
p-DIETHYLBENZENE	0.132	0.378	0.178	0.059	1.1914e+06	1.3445e+06	1363435	1.22654e+06
p-ETHYLTOLUENE	0.117	0.334	0.16	0.061	1.07328e+06	1.19367e+06	1.23854e+06	1.08657e+06
PHENOL	0.123	0.202	2.18	0.085	912879	839328	803684	710054
PHENYLTHIOL	0.129	0.344	0.619	0.076	844267	910773	892497	795362
PIPERIDINE	0.272	0.431	0.512	0.068	789374	900698	852270	822882
PROPANE	0.125	0.204	0.44	0.051	570842	665202	745433	571566
PROP-1-ENE	0.175	0.243	0.363	0.054	527804	606253	684713	507089
1,4-DIMETHYLBENZENE	0.185	0.413	0.194	0.062	963626	1.05484e+06	1.12092e+06	938095
PYRIDINE	0.166	0.369	0.693	0.082	681858	742814	717028	614352
PYRROLE	0.241	0.441	2.122	0.082	755603	672916	645793	546195
QUINOLINE	0.194	0.437	1.143	0.077	1.00142e+06	1.04932e+06	1.00486e+06	904161
1-(tert-BUTOXY)-1-METHYLPROPANE	0.203	0.394	2.263	0.058	976385	1.34462e+06	1.42437e+06	1.32476e+06
SULFUR DIOXIDE	0.18	0.28	0.599	0.091	432226	443310	443291	345169
TETRACHLOROETHYLENE	0.176	0.371	0.192	0.07	778790	872052	871769	794627
TETRAHYDROFURAN	0.161	0.318	0.251	0.07	665785	754978	750359	658753
THIACYCLOPENTANE	0.191	0.41	0.262	0.077	705136	816926	801661	730264
THIOPHENE	0.114	0.293	0.686	0.075	659872	700708	685237	590933
TOLUENE	0.169	0.371	0.175	0.066	816070	914856	930230	795356
trans-1,2-DIMETHYLCYCLOHEXANE	0.179	0.39	0.346	0.055	984350	1.17086e+06	1.15837e+06	1.14496e+06
trans-1,3-DIMETHYLCYCLOHEXANE	0.24	0.396	0.471	0.056	974775	1.16235e+06	1.16494e+06	1.14199e+06
trans-1,4-DIMETHYLCYCLOHEXANE	0.171	0.367	0.209	0.053	1.01123e+06	1.19258e+06	1.17957e+06	1.15727e+06
TRICHLOROETHYLENE	0.316	0.48	0.318	0.072	677957	777759	770864	694529
3-BUTENENITRILE	0.308	0.395	1.777	0.068	847762	752642	769485	621398
WATER	0.257	0.543	2.983	0.164	376421	285154	287755	208518
DIBORANE	0.071	0.136		0.046	490516	540101		443400
CARBON MONOXIDE	0.022	0.038	0.11	0.031	308306	335997	335907	221724
ARGON	0.018	0.037	0.21	0.035	278676	283052	283052	267467
KRYPTON	0.037	0.067	0.275	0.044	316446	324417	324417	308784
